## Erratum: Clinical and biological significance of *de novo* CD5+ diffuse large B-cell lymphoma in Western countries

Oncotarget. 2015; 8:5615-5633

PMID: 25760242

Lalitha Nagarajan is added as co-author.

<sup>5</sup> Department of Genetics and Leukemia, University of Texas MD Anderson Cancer Center, Houston, TX, USA

The corrected list of authors.

**Zijun Y. Xu-Monette<sup>1\*</sup>, Meifeng Tu<sup>2\*</sup>, Kausar J. Jabbar<sup>1</sup>, Xin Cao<sup>1</sup>, Alexandar Tzankov<sup>3</sup>, Carlo Visco<sup>4</sup>, Lalitha Nagarajan<sup>5</sup>, Qinging Cai<sup>1</sup>, Santiago Montes-Moreno<sup>6</sup>, Yuji An<sup>1</sup>, Karen Dybkaer<sup>7</sup>, April Chiu<sup>8</sup>, Attilio Orazi<sup>9</sup>, Youli Zu<sup>10</sup>, Govind Bhagat<sup>11</sup>, Kristy L. Richards<sup>12</sup>, Eric D. Hsi<sup>13</sup>, William W.L. Choi<sup>14</sup>, J. Han van Krieken<sup>15</sup>, Jooryung Huh<sup>16</sup>, Maurilio Ponzoni<sup>17</sup>, Andrés J.M. Ferreri<sup>17</sup>, Xiaoying Zhao<sup>18</sup>, Michael B. Møller<sup>19</sup>, John P. Farnen<sup>20</sup>, Jane N. Winter<sup>21</sup>, Miguel A. Piris<sup>6</sup>, Roberto N. Miranda<sup>1</sup>, L. Jeffrey Medeiros<sup>1</sup>, and Ken H. Young<sup>1,22\*</sup>**

<sup>1</sup> Department of Hematopathology, The University of Texas MD Anderson Cancer Center, Houston, TX, USA

<sup>2</sup> Peking University Cancer Hospital and Institute, Beijing, China

<sup>3</sup> University Hospital, Basel, Switzerland

<sup>4</sup> San Bortolo Hospital, Vicenza, Italy

<sup>5</sup> Department of Genetics and Leukemia, University of Texas MD Anderson Cancer Center, Houston, TX, USA

<sup>6</sup> Hospital Universitario Marques de Valdecilla, Santander, Spain

<sup>7</sup> Aalborg University Hospital, Aalborg, Denmark

<sup>8</sup> Memorial Sloan-Kettering Cancer Center, New York, NY, USA

<sup>9</sup> Weill Medical College of Cornell University, New York, NY, USA

<sup>10</sup> The Methodist Hospital, Houston, TX, USA

<sup>11</sup> Columbia University Medical Center and New York Presbyterian Hospital, New York, NY, USA

<sup>12</sup> University of North Carolina School of Medicine, Chapel Hill, NC, USA

<sup>13</sup> Cleveland Clinic, Cleveland, OH, USA

<sup>14</sup> University of Hong Kong Li Ka Shing Faculty of Medicine, Hong Kong, China

<sup>15</sup> Radboud University Nijmegen Medical Centre, Nijmegen, Netherlands

<sup>16</sup> San Medical Center, Ulsan University College of Medicine, Seoul, Korea

<sup>17</sup> San Raffaele H. Scientific Institute, Milan, Italy

<sup>18</sup> Zhejiang University School of Medicine, Second University Hospital, Hangzhou, China

<sup>19</sup> Odense University Hospital, Odense, Denmark

<sup>20</sup> Gundersen Lutheran Health System, La Crosse, WI, USA

<sup>21</sup> Feinberg School of Medicine, Northwestern University, Chicago, IL, USA

<sup>22</sup> The University of Texas School of Medicine, Graduate School of Biomedical Sciences, Houston, Texas, USA

\* These authors have equal contributions to this work.
